# Supplementary material for: Assessing the demographics of the 2021 and 2022 CEDAR workshop
Source: Frontiers journal article supplement (doi:10.3389/fspas.2022.1074460), 2022-11-29
Supplement: Table_1.XLSX [file Table_1.XLSX]

## Sheet: Figure 1a Data
	Participants by career stage
	all-participants	2021	2022
	students	237	103
	early career	148	61
	mid-career	168	70
	senior	242	83
	non-scientist	44	6
	no-response	0	1
	total	839	324

## Sheet: Figure 1b Data
	Participants by gender identity
		2021	2022
	she/her	237	86
	he/him	486	183
	non-binary	6	3
	no-answer	110	51
	total	839	323

## Sheet: Figure 1c Data
	gender idendity by career stage for 2021 & 2022
		student 21	student 22	early-career 21	early-career 22	mid-career 21	mid-career 22	senior 21	senior 22	non-scientist 21	non-scientist 22
	she/her	34.7619	38.7097	32.5581	17.8571	37.415	31.0345	24.0196	31.6667	46.2	60
	he/him	63.3333	59.1398	65.8915	80.3571	62.585	68.9655	75.9804	68.3333	53.8	40
	non-binary	1.90476	2.15054	1.55039	1.78571	0	0	0	0	0	0
	total	210	93	129	56	147	58	204	60	39	5

## Sheet: Figure 2a Data
	Race ethnicity for 2021 & 2022
		White	Non-white Hispanic, Latinx or Spanish	Black or African American	Asian+Desi+Middle Eastern	American Indian or Alaska Native, A Native Hawaiian or Pacific Islander	African
	2021	403	25	11	251	4	21
	2022	148	18	10	93	3	2

## Sheet: Figure 2b Data
	2021 race/ethnicity by career stage
		White	Non-white Hispanic, Latinx	Black or African American	Asian & Middle Eastern	American Indian or Alaska Native, Native Hawaiian or Pacific Islander	African
	students 21	47.0899	7.40741	3.7037	37.037	0.529101	6.87831
	early-career 21	41.129	4.03226	0.806452	53.2258	0.806452	2.41935
	mid-career 21	57.5342	2.05479	1.36986	39.0411	0.684932	2.05479
	senior 21	73.0392	0.980392	0.490196	25.4902	0.490196	0.980392
	non-scientist 21	81.0811	2.7027	0	16.2162	0	0

## Sheet: Figure S1 Data
2022 race/ethnicity by career stage	2021 race/ethnicity by career stage
	White	Non-white Hispanic, Latinx	Black or African American	Asian & Middle Eastern	American Indian or Alaska Native, Native Hawaiian or Pacific Islander	African
students 22	46.8085	11.7021	4.25532	37.234	0	2.12766
early-career 22	47.2727	1.81818	5.45455	43.6364	3.63636	0
mid-career 22	56.3636	7.27273	1.81818	36.3636	1.81818	0
senior 22	71.6667	1.66667	3.33333	23.3333	0	0
non-scientist 22	80	20	0	0	0	0
